# Supplementary material for: Utilization of Indole Acetic Acid with Leucadendron rubrum and Rhododendron pulchrum for the Phytoremediation of Heavy Metals in the Artificial Soil Made of Municipal Sewage Sludge
Source: MDPI journal article supplement (doi:10.3390/toxics11010043), 2022-12-31

**Table S1**

Pearson correlation coefficients of migration factor of heavy metals with physicochemical properties of soil and *R. pulchrum*.

| Item                 | pH | SOM    | CEC     | Chlorophyll | Leaf Biomass | Stem Biomass | Root Biomass | BCF-Cu  | BCF-Zn  | BCF-Pb  | BCF-Cd  | BCF-Ni  | TF-Cu   | TF-Zn   | TF-Pb   | TF-Cd   | TF-Ni   |
|----------------------|----|--------|---------|-------------|--------------|--------------|--------------|---------|---------|---------|---------|---------|---------|---------|---------|---------|---------|
| pH, $n=36$           | 1  | ○0.289 | ●-0.837 | ○0.213      | ○0.235       | ○-0.292      | ●-0.384      | ●0.403  | ○0.327  | ○-0.076 | ○-0.066 | ○0.082  | ○0.268  | ○-0.286 | ○0.279  | ○0.205  | ●-0.552 |
| SOM, $n=36$          |    | 1      | ●-0.369 | ○0.048      | ○0.068       | ○-0.056      | ○-0.210      | ○-0.144 | ○-0.302 | ●-0.412 | ○-0.330 | ○-0.085 | ○0.082  | ○0.057  | ○0.136  | ○-0.065 | ○-0.145 |
| CEC, $n=36$          |    |        | 1       | ○-0.258     | ○-0.172      | ○0.082       | ○0.243       | ●-0.392 | ●-0.432 | ○0.169  | ○0.103  | ○0.089  | ○-0.171 | ●0.373  | ○-0.142 | ○-0.120 | ●0.401  |
| Chlorophyll, $n=36$  |    |        |         | 1           | ○-0.124      | ○-0.172      | ●-0.373      | ○0.179  | ○-0.116 | ●-0.426 | ●-0.384 | ○-0.313 | ○0.125  | ○0.021  | ○0.243  | ○0.234  | ○0.159  |
| Leaf Biomass, $n=36$ |    |        |         |             | 1            | ●0.451       | ●0.429       | ○0.043  | ●0.414  | ●0.407  | ○0.328  | ●0.448  | ○-0.271 | ○-0.325 | ○-0.134 | ○-0.178 | ○-0.256 |
| Stem Biomass, $n=36$ |    |        |         |             |              | 1            | ●0.730       | ○-0.242 | ○0.076  | ○-0.060 | ○-0.048 | ○-0.103 | ○-0.039 | ○0.217  | ○-0.028 | ○-0.197 | ●0.451  |
| Root Biomass, $n=36$ |    |        |         |             |              |              | 1            | ○0.205  | ●0.477  | ●0.374  | ●0.451  | ●0.382  | ●-0.428 | ○-0.136 | ○-0.307 | ●-0.511 | ○0.222  |
| BCF-Cu, $n=27$       |    |        |         |             |              |              |              | 1       | ●0.435  | ○0.154  | ○0.279  | ●0.440  | ●-0.434 | ●-0.602 | ○-0.305 | ●-0.422 | ●-0.538 |
| BCF-Zn, $n=27$       |    |        |         |             |              |              |              |         | 1       | ●0.669  | ●0.554  | ●0.457  | ●-0.790 | ●-0.921 | ●-0.730 | ●-0.603 | ●-0.427 |
| BCF-Pb, $n=27$       |    |        |         |             |              |              |              |         |         | 1       | ●0.832  | ●0.694  | ●-0.703 | ●-0.667 | ●-0.786 | ●-0.457 | ●-0.439 |
| BCF-Cd, $n=27$       |    |        |         |             |              |              |              |         |         |         | 1       | ●0.794  | ●-0.631 | ●-0.603 | ●-0.581 | ●-0.627 | ●-0.559 |
| BCF-Ni, $n=27$       |    |        |         |             |              |              |              |         |         |         |         | 1       | ●-0.742 | ●-0.593 | ●-0.648 | ●-0.631 | ●-0.782 |
| TF-Cu, $n=36$        |    |        |         |             |              |              |              |         |         |         |         |         | 1       | ●0.700  | ●0.801  | ●0.586  | ○0.137  |
| TF-Zn, $n=36$        |    |        |         |             |              |              |              |         |         |         |         |         |         | 1       | ●0.586  | ●0.368  | ●0.578  |
| TF-Pb, $n=36$        |    |        |         |             |              |              |              |         |         |         |         |         |         |         | 1       | ○0.304  | ○0.084  |
| TF-Cd, $n=36$        |    |        |         |             |              |              |              |         |         |         |         |         |         |         |         | 1       | ○0.091  |
| TF-Ni, $n=36$        |    |        |         |             |              |              |              |         |         |         |         |         |         |         |         |         | 1       |

●, ● means significant at  $p < 0.05$  and  $p < 0.01$ (two-tailed), respectively; ○ means not significant.

Table S2

Pearson correlation coefficients of migration factors of heavy metals with physicochemical properties of soil and *L. rubrum*.

| Item                       | pH | SOM    | CEC     | Chlorophyll | Leaf Biomass | Stem Biomass | Root Biomass | BCF-Cu  | BCF-Zn  | BCF-Pb  | BCF-Cd  | BCF-Ni  | TF-Cu   | TF-Zn   | TF-Pb   | TF-Cd   | TF-Ni   |
|----------------------------|----|--------|---------|-------------|--------------|--------------|--------------|---------|---------|---------|---------|---------|---------|---------|---------|---------|---------|
| pH, <i>n</i> =36           | 1  | -0.079 | ○-0.021 | ○0.092      | ○-0.154      | ○0.039       | ○-0.204      | ○-0.065 | ○0.024  | ○-0.120 | ○-0.299 | ○-0.223 | ○-0.163 | ○-0.095 | ○0.185  | ○0.234  | ●-0.438 |
| SOM, <i>n</i> =36          |    | 1      | ○-0.236 | ○-0.069     | ●0.356       | ○-0.220      | ●0.360       | ○0.380  | ●0.457  | ○0.142  | ○0.233  | ○0.164  | ○-0.016 | ●-0.348 | ○-0.105 | ●-0.359 | ○-0.176 |
| CEC, <i>n</i> =36          |    |        | 1       | ○0.028      | ●0.423       | ○0.057       | ○0.072       | ●-0.845 | ●-0.908 | ○-0.191 | ○0.033  | ●-0.413 | ●-0.344 | ○-0.157 | ●-0.559 | ●0.378  | ○-0.197 |
| Chlorophyll, <i>n</i> =36  |    |        |         | 1           | ○0.033       | ○0.173       | ○0.057       | ●0.495  | ●0.442  | ●0.470  | ○-0.085 | ●0.448  | ●-0.492 | ●-0.386 | ○-0.110 | ○0.279  | ○0.031  |
| Leaf Biomass, <i>n</i> =36 |    |        |         |             | 1            | ○0.215       | ●0.719       | ○0.118  | ○0.093  | ○0.241  | ○0.117  | ○0.178  | ●-0.336 | ●-0.613 | ●-0.580 | ○0.025  | ●-0.455 |
| Stem Biomass, <i>n</i> =36 |    |        |         |             |              | 1            | ●0.360       | ○0.053  | ○0.023  | ○0.239  | ○0.275  | ●0.521  | ○-0.018 | ○-0.009 | ○0.247  | ○-0.129 | ○-0.072 |
| Root Biomass, <i>n</i> =36 |    |        |         |             |              |              | 1            | ○0.225  | ○0.296  | ○0.301  | ○0.183  | ○0.338  | ○-0.101 | ●-0.417 | ○-0.292 | ○-0.013 | ●-0.467 |
| BCF-Cu, <i>n</i> =27       |    |        |         |             |              |              |              | 1       | ●0.951  | ●0.476  | ○0.076  | ●0.562  | ●-0.874 | ●-0.751 | ○0.066  | ●-0.402 | ○0.069  |
| BCF-Zn, <i>n</i> =27       |    |        |         |             |              |              |              |         | 1       | ●0.434  | ○0.042  | ●0.526  | ●-0.752 | ●-0.783 | ○0.074  | ○-0.321 | ○-0.033 |
| BCF-Pb, <i>n</i> =27       |    |        |         |             |              |              |              |         |         | 1       | ○0.224  | ●0.683  | ○-0.262 | ○-0.326 | ○0.064  | ○-0.228 | ○-0.366 |
| BCF-Cd, <i>n</i> =27       |    |        |         |             |              |              |              |         |         |         | 1       | ○0.330  | ○0.127  | ○-0.049 | ○0.174  | ●-0.506 | ○-0.054 |
| BCF-Ni, <i>n</i> =27       |    |        |         |             |              |              |              |         |         |         |         | 1       | ○-0.363 | ●-0.440 | ○0.323  | ●-0.434 | ○-0.340 |
| TF-Cu, <i>n</i> =36        |    |        |         |             |              |              |              |         |         |         |         |         | 1       | ●0.841  | ●0.581  | ○-0.071 | ○-0.023 |
| TF-Zn, <i>n</i> =36        |    |        |         |             |              |              |              |         |         |         |         |         |         | 1       | ●0.637  | ○0.014  | ○0.235  |
| TF-Pb, <i>n</i> =36        |    |        |         |             |              |              |              |         |         |         |         |         |         |         | 1       | ○-0.280 | ●0.419  |
| TF-Cd, <i>n</i> =36        |    |        |         |             |              |              |              |         |         |         |         |         |         |         |         | 1       | ○-0.051 |
| TF-Ni, <i>n</i> =36        |    |        |         |             |              |              |              |         |         |         |         |         |         |         |         |         | 1       |

●, ● means significant at  $p < 0.05$  and  $0.01$ (two-tailed), respectively; ○ means not significant.

**Figure S1.** Root-shoot biomass ratio of *L. rubrum* and *R. pulchrum* before and after IAA treatments. The letter in the same column of the same plant indicate significant differences among the treatments,  $p < 0.05$ .

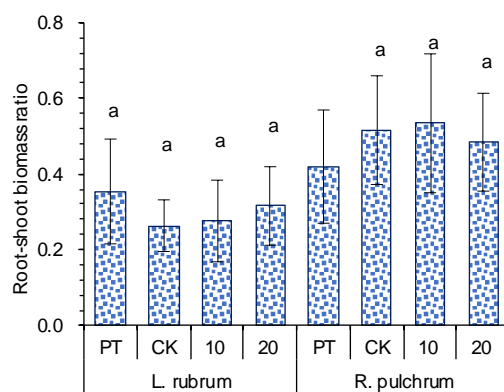

Supplement: s1 [file s1]
